# Supplementary material
Source: PubMed Central journal article supplement (PMC3284120)

**Table 1 All SNPs including novel common variants identified in the re-sequencing of in the COPD Susceptibility Locus, Intervening Region, and the HHIP Gene**

| Position(hg18) | rsID (dbSNP 130) | Ref | Alt | MAF     | Function*  |
|----------------|------------------|-----|-----|---------|------------|
| 145654034      | rs1032295        | T   | G   | 0.3448  | intergenic |
| 145654138      | rs1032296        | T   | C   | 0.4655  | intergenic |
| 145654194      | rs1032297        | A   | G   | 0.3966  | intergenic |
| 145654206      |                  | C   | A   | 0.01724 | intergenic |
| 145654351      | rs1512281        | A   | G   | 0.3966  | intergenic |
| 145655383      |                  | A   | G   | 0.08621 | intergenic |
| 145655774      | rs12504628       | T   | C   | 0.3448  | intergenic |
| 145656344      | rs7697189        | G   | C   | 0.3448  | intergenic |
| 145656464      | rs7681384        | T   | C   | 0.4828  | intergenic |
| 145656531      | rs7698984        | C   | A   | 0.4828  | intergenic |
| 145656769      | rs7677035        | A   | G   | 0.4828  | intergenic |
| 145656797      |                  | C   | T   | 0.01724 | intergenic |
| 145658477      | rs4835637        | A   | G   | 0.4828  | intergenic |
| 145658743      | rs4835638        | A   | T   | 0.1724  | intergenic |
| 145659680      | rs28420257       | A   | G   | 0.1897  | intergenic |
| 145659738      | rs6829956        | C   | T   | 0.4828  | intergenic |
| 145659926      |                  | G   | A   | 0.01724 | intergenic |
| 145660438      |                  | G   | A   | 0.01724 | intergenic |
| 145661209      | rs6854832        | C   | T   | 0.1724  | intergenic |
| 145661779      |                  | G   | A   | 0.01724 | intergenic |
| 145661814      | rs13116999       | G   | A   | 0.4828  | intergenic |
| 145662113      | rs17019423       | T   | C   | 0.03448 | intergenic |
| 145662174      |                  | C   | T   | 0.01724 | intergenic |
| 145662820      | rs11938704       | A   | C   | 0.1724  | intergenic |
| 145663084      |                  | G   | C   | 0.03448 | intergenic |
| 145663270      |                  | A   | G   | 0.01724 | intergenic |
| 145663313      |                  | C   | G   | 0.01724 | intergenic |
| 145663489      | rs13107186       | A   | C   | 0.4828  | intergenic |
| 145667433      | rs2130337        | G   | A   | 0.1724  | intergenic |
| 145669272      |                  | T   | G   | 0.03448 | intergenic |
| 145670409      | rs1512285        | A   | G   | 0.4828  | intergenic |
| 145671363      | rs4835639        | G   | T   | 0.4483  | intergenic |
| 145671839      | rs6821114        | A   | G   | 0.4483  | intergenic |
| 145672153      | rs6821716        | A   | C   | 0.4483  | intergenic |
| 145672154      | rs6843820        | G   | C   | 0.4483  | intergenic |
| 145672233      | rs6845536        | C   | T   | 0.4483  | intergenic |
| 145672553      |                  | G   | A   | 0.03448 | intergenic |

|           |            |   |   |         |            |
|-----------|------------|---|---|---------|------------|
| 145673015 |            | C | T | 0.01724 | intergenic |
| 145673678 | rs1489764  | T | C | 0.4483  | intergenic |
| 145673682 | rs1489763  | C | T | 0.3448  | intergenic |
| 145673824 | rs13129662 | C | T | 0.3448  | intergenic |
| 145674414 | rs1489762  | T | C | 0.3448  | intergenic |
| 145674941 | rs1489761  | G | A | 0.4483  | intergenic |
| 145674977 |            | A | G | 0.1207  | intergenic |
| 145675000 | rs7435469  | C | T | 0.3448  | intergenic |
| 145675215 | rs62345400 | C | A | 0.06897 | intergenic |
| 145675480 |            | C | T | 0.01724 | intergenic |
| 145675582 |            | C | T | 0.01724 | intergenic |
| 145676591 | rs7692102  | A | G | 0.4483  | intergenic |
| 145676910 |            | C | T | 0.01724 | intergenic |
| 145677451 | rs7674469  | C | A | 0.4483  | intergenic |
| 145677934 | rs11936476 | T | C | 0.3448  | intergenic |
| 145679680 | rs13147758 | A | G | 0.3448  | intergenic |
| 145679788 | rs13148031 | A | G | 0.3448  | intergenic |
| 145680569 |            | T | C | 0.1552  | intergenic |
| 145680610 |            | A | T | 0.01724 | intergenic |
| 145680989 |            | T | A | 0.01724 | intergenic |
| 145681814 | rs720484   | G | A | 0.3448  | intergenic |
| 145682038 | rs720485   | A | C | 0.3448  | intergenic |
| 145682681 | rs6828540  | G | A | 0.3448  | intergenic |
| 145683120 |            | G | C | 0.01724 | intergenic |
| 145683524 | rs6537291  | T | A | 0.1607  | intergenic |
| 145684335 | rs2130339  | A | G | 0.3448  | intergenic |
| 145684911 | rs36023701 | C | G | 0.2857  | intergenic |
| 145684941 | rs6830832  | T | G | 0.3448  | intergenic |
| 145685218 | rs11938745 | T | C | 0.3448  | intergenic |
| 145685651 | rs2130338  | G | A | 0.2069  | intergenic |
| 145686128 | rs2220516  | C | G | 0.2069  | intergenic |
| 145686601 | rs2220515  | T | C | 0.2069  | intergenic |
| 145686647 |            | C | T | 0.01724 | intergenic |
| 145686662 | rs12506874 | A | T | 0.3448  | intergenic |
| 145688134 |            | T | G | 0.01724 | intergenic |
| 145688241 | rs7663578  | G | A | 0.4483  | intergenic |
| 145688295 | rs7663740  | G | T | 0.4483  | intergenic |
| 145688539 | rs72731595 | T | A | 0.08621 | intergenic |
| 145688823 | rs62346060 | G | A | 0.2241  | intergenic |
| 145689418 | rs6537292  | G | T | 0.3448  | intergenic |
| 145690054 | rs6828982  | T | C | 0.4483  | intergenic |

|           |            |   |   |         |            |
|-----------|------------|---|---|---------|------------|
| 145690107 | rs6829184  | T | A | 0.3448  | intergenic |
| 145690695 | rs12511230 | A | T | 0.3448  | intergenic |
| 145690918 | rs10028899 | A | T | 0.05172 | intergenic |
| 145691395 | rs6831503  | A | G | 0.3448  | intergenic |
| 145692216 | rs13113445 | T | G | 0.3333  | intergenic |
| 145692443 | rs1996022  | A | C | 0.2241  | intergenic |
| 145692536 |            | G | C | 0.03448 | intergenic |
| 145692646 | rs1828590  | G | A | 0.4211  | intergenic |
| 145693747 | rs1489760  | G | A | 0.3448  | intergenic |
| 145693923 | rs1489759  | A | G | 0.3448  | intergenic |
| 145694794 |            | C | T | 0.01724 | intergenic |
| 145697499 | rs1813903  | C | G | 0.3448  | intergenic |
| 145697651 | rs995758   | C | T | 0.3448  | intergenic |
| 145697708 |            | C | T | 0.03448 | intergenic |
| 145698112 | rs12509311 | C | T | 0.3448  | intergenic |
| 145698227 | rs4834988  | C | A | 0.431   | intergenic |
| 145698589 | rs11100860 | A | G | 0.3448  | intergenic |
| 145698617 | rs28758624 | G | A | 0.2241  | intergenic |
| 145699211 | rs6537293  | A | G | 0.3448  | intergenic |
| 145699213 | rs6537294  | C | A | 0.3448  | intergenic |
| 145699265 |            | A | G | 0.01724 | intergenic |
| 145699330 | rs6842889  | T | C | 0.3448  | intergenic |
| 145699790 | rs10519717 | T | C | 0.2241  | intergenic |
| 145700230 | rs1828591  | A | G | 0.3448  | intergenic |
| 145701671 | rs13435341 | C | G | 0.2241  | intergenic |
| 145701693 | rs28626624 | C | T | 0.3448  | intergenic |
| 145701997 | rs1565330  | C | T | 0.3448  | intergenic |
| 145704088 | rs12510044 | C | G | 0.431   | intergenic |
| 145704373 | rs1980056  | C | A | 0.3448  | intergenic |
| 145704968 |            | A | G | 0.01724 | intergenic |
| 145705010 |            | C | T | 0.01724 | intergenic |
| 145705011 | rs1489766  | G | A | 0.01724 | intergenic |
| 145705188 | rs1980057  | C | T | 0.3448  | intergenic |
| 145705365 | rs7655625  | T | C | 0.3448  | intergenic |
| 145705839 | rs13118928 | A | G | 0.3448  | intergenic |
| 145707384 | rs6537296  | A | G | 0.3448  | intergenic |
| 145707784 | rs1542725  | C | T | 0.3448  | intergenic |
| 145708349 |            | C | A | 0.01724 | intergenic |
| 145708547 | rs13113591 | C | T | 0.3448  | intergenic |
| 145708548 | rs13140176 | A | G | 0.3448  | intergenic |
| 145708778 | rs11940733 | G | A | 0.3448  | intergenic |

|           |            |   |   |         |            |
|-----------|------------|---|---|---------|------------|
| 145708826 |            | G | A | 0.01724 | intergenic |
| 145709809 | rs12501071 | C | T | 0.3448  | intergenic |
| 145710731 | rs1512288  | G | A | 0.3448  | intergenic |
| 145711352 |            | A | C | 0.1724  | intergenic |
| 145711453 | rs6817273  | T | C | 0.3448  | intergenic |
| 145711499 |            | T | C | 0.01724 | intergenic |
| 145713855 |            | C | T | 0.01724 | intergenic |
| 145716391 | rs2175586  | A | G | 0.03448 | intergenic |
| 145717824 |            | T | C | 0.06897 | intergenic |
| 145717862 | rs10029430 | G | A | 0.431   | intergenic |
| 145718193 |            | C | T | 0.01724 | intergenic |
| 145718478 | rs17019496 | G | A | 0.1724  | intergenic |
| 145718654 | rs17019499 | C | A | 0.1724  | intergenic |
| 145718839 | rs34544231 | C | T | 0.05172 | intergenic |
| 145718923 |            | C | A | 0.05172 | intergenic |
| 145720046 | rs13136959 | T | C | 0.05172 | intergenic |
| 145720563 |            | C | T | 0.01724 | intergenic |
| 145720651 | rs1844430  | T | C | 0       | intergenic |
| 145720924 |            | C | T | 0.05172 | intergenic |
| 145720940 |            | T | A | 0.01724 | intergenic |
| 145721012 |            | C | T | 0.01724 | intergenic |
| 145721479 | rs6537297  | C | T | 0.4138  | intergenic |
| 145721571 | rs71614512 | G | A | 0.05172 | intergenic |
| 145722024 | rs71614513 | T | C | 0.05172 | intergenic |
| 145723621 |            | T | G | 0.01724 | intergenic |
| 145725088 | rs10013495 | C | T | 0.2241  | intergenic |
| 145725906 | rs13141641 | T | C | 0.3621  | intergenic |
| 145726008 | rs6852830  | C | A | 0.2414  | intergenic |
| 145726208 | rs56984525 | A | G | 0.1552  | intergenic |
| 145726321 | rs6537298  | C | T | 0.4138  | intergenic |
| 145726726 |            | A | T | 0.01724 | intergenic |
| 145727290 | rs35742577 | C | T | 0.2241  | intergenic |
| 145727407 |            | G | A | 0.1724  | intergenic |
| 145728341 | rs1828589  | T | C | 0.2241  | intergenic |
| 145728715 |            | A | T | 0.01724 | intergenic |
| 145729198 | rs35800482 | A | G | 0.05172 | intergenic |
| 145730172 |            | C | G | 0.01724 | intergenic |
| 145730490 | rs11724319 | A | G | 0.3448  | intergenic |
| 145730644 | rs1996020  | A | C | 0.2241  | intergenic |
| 145731025 | rs1996021  | T | C | 0.2241  | intergenic |
| 145731047 | rs71614516 | A | C | 0.05172 | intergenic |

|           |            |   |   |         |            |
|-----------|------------|---|---|---------|------------|
| 145731325 | rs7670758  | A | G | 0.4138  | intergenic |
| 145731516 |            | G | A | 0.01724 | intergenic |
| 145732023 |            | C | T | 0.03448 | intergenic |
| 145732503 | rs7677662  | A | G | 0.1724  | intergenic |
| 145732629 | rs7700244  | C | T | 0.1724  | intergenic |
| 145733911 | rs1398243  | G | A | 0.05172 | intergenic |
| 145734322 | rs7666523  | C | T | 0.1724  | intergenic |
| 145734392 |            | A | G | 0.01724 | intergenic |
| 145735017 |            | C | T | 0.01724 | intergenic |
| 145735219 | rs1542726  | A | C | 0.4138  | intergenic |
| 145735828 | rs1489765  | C | T | 0.431   | intergenic |
| 145737028 | rs2353397  | C | T | 0.4655  | intergenic |
| 145737031 | rs72733512 | A | G | 0.01724 | intergenic |
| 145737581 |            | C | T | 0.03448 | intergenic |
| 145737762 | rs17019517 | G | A | 0.03448 | intergenic |
| 145740058 | rs4835180  | A | G | 0.4821  | intergenic |
| 145740232 |            | T | A | 0.01786 | intergenic |
| 145740639 | rs10023833 | G | C | 0.4821  | intergenic |
| 145741153 | rs12648786 | G | A | 0.4107  | intergenic |
| 145741317 | rs2035901  | A | G | 0.4821  | intergenic |
| 145741898 | rs72617417 | A | G | 0.03448 | intergenic |
| 145742113 | rs1994812  | G | A | 0.03571 | intergenic |
| 145742208 | rs2353398  | T | A | 0.4464  | intergenic |
| 145742521 | rs13103733 | C | T | 0.375   | intergenic |
| 145742595 |            | C | T | 0.03571 | intergenic |
| 145743331 |            | C | T | 0.01786 | intergenic |
| 145743922 |            | T | C | 0.01786 | intergenic |
| 145744125 | rs62346065 | T | C | 0.07143 | intergenic |
| 145744232 |            | A | G | 0.01786 | intergenic |
| 145744857 | rs56095409 | G | T | 0.5     | intergenic |
| 145745306 | rs6814119  | C | T | 0.4464  | intergenic |
| 145745886 |            | T | A | 0.01786 | intergenic |
| 145746365 |            | A | G | 0.01786 | intergenic |
| 145746542 |            | T | C | 0.01724 | intergenic |
| 145746789 | rs6856849  | T | G | 0.4286  | intergenic |
| 145747735 |            | T | C | 0.01786 | intergenic |
| 145747813 |            | C | T | 0.01786 | intergenic |
| 145747854 |            | C | T | 0.01786 | intergenic |
| 145749044 | rs4835181  | G | A | 0.4483  | intergenic |
| 145749153 | rs10011200 | C | G | 0.4483  | intergenic |
| 145749735 | rs2035744  | T | C | 0.01724 | intergenic |

|           |            |   |   |         |            |
|-----------|------------|---|---|---------|------------|
| 145750061 | rs7654905  | C | T | 0.01724 | intergenic |
| 145750256 | rs7655287  | C | A | 0.01724 | intergenic |
| 145750464 |            | G | A | 0.01724 | intergenic |
| 145750470 |            | C | T | 0.03448 | intergenic |
| 145750648 | rs11931085 | G | A | 0.01724 | intergenic |
| 145750682 |            | A | C | 0.05172 | intergenic |
| 145751153 |            | C | T | 0.01724 | intergenic |
| 145751295 | rs2883154  | C | T | 0.05172 | intergenic |
| 145751497 | rs57271340 | C | T | 0.03448 | intergenic |
| 145751498 |            | G | A | 0.01724 | intergenic |
| 145751691 | rs72733517 | T | C | 0.01724 | intergenic |
| 145753806 |            | C | G | 0.01724 | intergenic |
| 145755419 |            | T | C | 0.05172 | intergenic |
| 145755421 | rs7671078  | T | C | 0.03448 | intergenic |
| 145755746 |            | T | G | 0.01724 | intergenic |
| 145755786 | rs7692554  | G | A | 0.4828  | intergenic |
| 145756454 |            | C | G | 0.01724 | intergenic |
| 145756696 | rs12711419 | C | T | 0.05172 | intergenic |
| 145757198 | rs13327924 | G | A | 0.05172 | intergenic |
| 145757199 |            | G | A | 0.03448 | intergenic |
| 145757300 | rs11947381 | T | C | 0.4483  | intergenic |
| 145757826 | rs28703835 | A | G | 0.05172 | intergenic |
| 145758839 |            | C | T | 0.01724 | intergenic |
| 145760273 |            | G | A | 0.03448 | intergenic |
| 145761314 | rs11934366 | T | G | 0.01724 | intergenic |
| 145761343 | rs13146616 | C | T | 0.4828  | intergenic |
| 145762118 | rs7699073  | C | G | 0.4828  | intergenic |
| 145762324 | rs2942220  | C | T | 0.01724 | intergenic |
| 145762646 | rs2575577  | G | C | 0.01724 | intergenic |
| 145762779 | rs13119931 | G | C | 0.4828  | intergenic |
| 145763226 | rs17720281 | C | T | 0.5     | intergenic |
| 145763838 |            | T | G | 0.03448 | intergenic |
| 145764197 |            | C | T | 0.01724 | intergenic |
| 145764286 | rs17776795 | A | G | 0.5     | intergenic |
| 145764385 | rs2575574  | A | G | 0.05172 | intergenic |
| 145764507 |            | A | G | 0.01724 | intergenic |
| 145764881 | rs72617418 | C | T | 0.03448 | intergenic |
| 145765906 | rs2255895  | G | C | 0.4138  | intergenic |
| 145765990 | rs2639582  | A | G | 0.4483  | intergenic |
| 145766316 | rs7679425  | C | T | 0.5     | intergenic |
| 145766635 | rs72733520 | A | G | 0.4483  | intergenic |

|           |            |   |   |         |             |
|-----------|------------|---|---|---------|-------------|
| 145767351 |            | A | G | 0.01724 | intergenic  |
| 145768383 | rs2575570  | T | G | 0.01724 | intergenic  |
| 145769418 | rs34792358 | G | C | 0.4828  | intergenic  |
| 145769718 |            | G | A | 0.01724 | intergenic  |
| 145769775 | rs62346124 | T | C | 0.5     | intergenic  |
| 145772179 | rs2575572  | T | C | 0.4483  | intergenic  |
| 145772268 | rs58968811 | G | A | 0.03448 | intergenic  |
| 145772500 |            | G | A | 0.03448 | intergenic  |
| 145773215 |            | G | C | 0.03448 | intergenic  |
| 145773975 |            | C | T | 0.03448 | intergenic  |
| 145775132 | rs61420014 | T | C | 0.03448 | intergenic  |
| 145775139 |            | T | C | 0.01724 | intergenic  |
| 145775235 |            | T | C | 0.01724 | intergenic  |
| 145775239 |            | A | C | 0.08621 | intergenic  |
| 145775570 |            | A | G | 0.01724 | intergenic  |
| 145775676 | rs6814581  | C | T | 0.5     | intergenic  |
| 145776620 | rs72733521 | G | A | 0.3793  | intergenic  |
| 145777101 | rs11100862 | T | A | 0.5     | intergenic  |
| 145777395 | rs72617419 | C | T | 0.03448 | intergenic  |
| 145779287 |            | T | C | 0.08621 | intergenic  |
| 145779448 | rs34247320 | C | G | 0.3793  | intergenic  |
| 145779616 | rs62346126 | C | A | 0.1207  | intergenic  |
| 145779782 | rs67904839 | G | A | 0.5     | intergenic  |
| 145780072 | rs2353399  | T | A | 0       | intergenic  |
| 145780354 | rs12500932 | C | A | 0.4828  | intergenic  |
| 145781326 |            | C | T | 0.08621 | intergenic  |
| 145781478 | rs62346127 | T | C | 0.3793  | intergenic  |
| 145781892 |            | A | T | 0.01724 | intergenic  |
| 145781907 | rs1398244  | C | T | 0.3793  | intergenic  |
| 145781981 | rs34939090 | C | G | 0.4828  | intergenic  |
| 145782862 |            | G | C | 0.01724 | intergenic  |
| 145783618 |            | T | C | 0.06897 | intergenic  |
| 145783977 |            | A | G | 0.1034  | intergenic  |
| 145783995 | rs11730787 | G | A | 0.3793  | intergenic  |
| 145784429 | rs72733526 | G | C | 0.01724 | intergenic  |
| 145784566 | rs7680661  | G | A | 0.08621 | intergenic  |
| 145784618 | rs72617420 | A | C | 0.03448 | intergenic  |
| 145785276 | rs6845999  | C | T | 0.4828  | near-gene-5 |
| 145785709 |            | G | T | 0.1034  | near-gene-5 |
| 145785835 |            | G | A | 0.03448 | near-gene-5 |
| 145785915 |            | G | A | 0.08929 | near-gene-5 |

|           |            |   |   |         |             |
|-----------|------------|---|---|---------|-------------|
| 145785927 | rs1355603  | T | C | 0.09615 | near-gene-5 |
| 145785988 |            | A | T | 0.08929 | near-gene-5 |
| 145786237 |            | G | C | 0.01923 | near-gene-5 |
| 145786298 | rs13125694 | C | T | 0.4821  | near-gene-5 |
| 145786314 | rs13106087 | T | C | 0.1786  | near-gene-5 |
| 145786921 | rs12507427 | T | A | 0.4821  | utr-5       |
| 145787802 | rs7689420  | T | C | 0.1     | intron      |
| 145787901 | rs72617421 | G | A | 0.03571 | intron      |
| 145787975 |            | C | T | 0.01852 | intron      |
| 145788132 | rs72617422 | A | C | 0.03571 | intron      |
| 145789052 |            | T | C | 0.03448 | intron      |
| 145789142 | rs13146972 | C | T | 0.4828  | intron      |
| 145789282 | rs1109181  | C | A | 0.03448 | intron      |
| 145791144 | rs13136840 | A | C | 0.4828  | intron      |
| 145791496 | rs7675744  | T | C | 0.4483  | intron      |
| 145792051 | rs7676399  | A | T | 0.4643  | intron      |
| 145793646 | rs1844428  | A | G | 0.08929 | intron      |
| 145793689 | rs1489758  | G | T | 0.3966  | intron      |
| 145794227 |            | C | G | 0.1429  | intron      |
| 145794229 |            | C | T | 0.3333  | intron      |
| 145796008 | rs2220514  | G | A | 0.5     | intron      |
| 145796106 | rs2635680  | T | C | 0       | intron      |
| 145796820 | rs2035742  | A | G | 0.03448 | intron      |
| 145797086 | rs2035900  | T | C | 0.431   | intron      |
| 145797275 |            | A | G | 0.01724 | intron      |
| 145797852 |            | G | A | 0.01724 | intron      |
| 145798117 | rs17720753 | T | C | 0.4828  | intron      |
| 145798249 | rs62346130 | C | T | 0.4828  | intron      |
| 145798974 |            | T | C | 0.01724 | intron      |
| 145799040 | rs7680782  | T | C | 0.431   | intron      |
| 145799116 |            | G | A | 0.01724 | intron      |
| 145799357 | rs6537301  | G | A | 0.431   | intron      |
| 145799622 |            | T | C | 0.01724 | intron      |
| 145799740 | rs1355601  | C | A | 0.4828  | intron      |
| 145799771 |            | C | T | 0.01724 | intron      |
| 145800035 | rs1355602  | A | C | 0.431   | intron      |
| 145800089 |            | G | C | 0.01724 | intron      |
| 145800908 |            | C | A | 0.1552  | intron      |
| 145801046 | rs1387631  | T | C | 0.431   | intron      |
| 145801059 |            | A | T | 0.01724 | intron      |
| 145801176 |            | A | G | 0.01724 | intron      |



|           |            |   |   |         |        |
|-----------|------------|---|---|---------|--------|
| 145801363 |            | A | G | 0.03448 | intron |
| 145801444 | rs60684117 | A | T | 0.03448 | intron |
| 145801986 | rs2306924  | A | G | 0.431   | intron |
| 145802270 | rs13145247 | T | C | 0.431   | intron |
| 145803625 | rs58797593 | T | G | 0.03448 | intron |
| 145803657 | rs7687599  | T | G | 0.5     | intron |
| 145804495 |            | G | T | 0.03448 | intron |
| 145804804 | rs6852346  | A | T | 0.5     | intron |
| 145804971 | rs6825848  | G | A | 0.5     | intron |
| 145805247 | rs62346131 | T | C | 0.01724 | intron |
| 145805358 |            | C | A | 0.01724 | intron |
| 145805493 | rs12501043 | T | C | 0.5     | intron |
| 145805909 | rs982903   | A | G | 0.5     | intron |
| 145806303 |            | A | G | 0.03448 | intron |
| 145806350 | rs982902   | G | A | 0.5     | intron |
| 145807566 | rs6537302  | A | T | 0.5     | intron |
| 145807674 |            | G | T | 0.03448 | intron |
| 145808355 | rs57498151 | T | A | 0.03448 | intron |
| 145808421 | rs55645717 | A | G | 0.03448 | intron |
| 145808682 |            | G | A | 0.03448 | intron |
| 145808703 |            | G | T | 0.01724 | intron |
| 145809294 | rs6537303  | C | A | 0.5     | intron |
| 145809455 | rs6537304  | C | T | 0.431   | intron |
| 145809721 |            | A | T | 0.01724 | intron |
| 145809895 | rs4834989  | A | T | 0.03448 | intron |
| 145810383 | rs7340949  | A | G | 0.431   | intron |
| 145810511 | rs6537305  | A | G | 0.5     | intron |
| 145810526 |            | G | A | 0.01724 | intron |
| 145810876 | rs6832061  | C | A | 0.5     | intron |
| 145811809 |            | T | C | 0.01724 | intron |
| 145812136 | rs17777628 | G | A | 0.03448 | intron |
| 145812478 | rs1844429  | T | C | 0.3654  | intron |
| 145812532 |            | G | T | 0.02632 | intron |
| 145813124 | rs11938839 | G | C | 0.5     | intron |
| 145813151 |            | G | C | 0.03448 | intron |
| 145813786 |            | G | C | 0.01724 | intron |
| 145814663 |            | C | T | 0.01724 | intron |
| 145815643 |            | C | T | 0.03448 | intron |
| 145816525 | rs60776266 | G | C | 0.03448 | intron |
| 145817209 | rs2055059  | A | G | 0.3276  | intron |
| 145817765 | rs6826476  | C | T | 0.2414  | intron |

|           |            |   |   |         |        |
|-----------|------------|---|---|---------|--------|
| 145818376 |            | C | T | 0.03448 | intron |
| 145818984 | rs11946517 | G | C | 0.3276  | intron |
| 145819358 | rs2131354  | G | A | 0.4138  | intron |
| 145819530 | rs34671273 | G | C | 0.03448 | intron |
| 145819682 |            | C | T | 0.01724 | intron |
| 145820220 |            | A | G | 0.01724 | intron |
| 145821313 | rs6537307  | A | G | 0.3793  | intron |
| 145821417 |            | C | T | 0.01724 | intron |
| 145821574 | rs1472172  | C | A | 0.03448 | intron |
| 145821947 | rs2639583  | T | C | 0.1034  | intron |
| 145822218 | rs72948477 | G | T | 0.03448 | intron |
| 145822313 |            | C | T | 0.03448 | intron |
| 145824303 | rs6537308  | G | T | 0.3621  | intron |
| 145824475 | rs2575580  | A | G | 0.1034  | intron |
| 145824483 | rs6819412  | T | C | 0.3966  | intron |
| 145824525 | rs6537309  | T | C | 0.3621  | intron |
| 145824723 | rs6819982  | T | C | 0.431   | intron |
| 145825170 |            | C | T | 0.03448 | intron |
| 145825471 | rs13106160 | C | T | 0.3621  | intron |
| 145825676 |            | G | A | 0.03448 | intron |
| 145825759 |            | A | C | 0.03448 | intron |
| 145827296 | rs7699480  | C | T | 0.3621  | intron |
| 145827313 |            | A | G | 0.01724 | intron |
| 145827352 | rs7698158  | G | A | 0.3621  | intron |
| 145828084 |            | A | G | 0.01724 | intron |
| 145829509 |            | A | C | 0.03448 | intron |
| 145830017 |            | G | A | 0.01724 | intron |
| 145832001 | rs63121460 | C | A | 0.3966  | intron |
| 145832002 | rs12511407 | A | T | 0.3966  | intron |
| 145832872 |            | T | C | 0.03448 | intron |
| 145833001 | rs13146352 | A | G | 0.3966  | intron |
| 145833170 | rs17721599 | C | T | 0.1034  | intron |
| 145833257 | rs6812830  | G | A | 0.3966  | intron |
| 145833352 |            | G | C | 0.03448 | intron |
| 145834434 | rs13131837 | G | A | 0.4138  | intron |
| 145836405 |            | C | T | 0.03448 | intron |
| 145837198 | rs7439494  | G | A | 0.3793  | intron |
| 145837396 | rs1907867  | C | T | 0.3793  | intron |
| 145838169 | rs17721701 | T | C | 0.3793  | intron |
| 145838863 | rs1492819  | T | C | 0.4138  | intron |
| 145840004 | rs34958276 | G | A | 0.3793  | intron |

|           |            |   |   |         |        |
|-----------|------------|---|---|---------|--------|
| 145840778 |            | G | A | 0.08621 | intron |
| 145841129 |            | A | G | 0.01724 | intron |
| 145841650 |            | G | A | 0.08621 | intron |
| 145842101 | rs12502033 | T | C | 0.3793  | intron |
| 145842288 |            | G | C | 0.01724 | intron |
| 145842557 | rs6838704  | G | A | 0.3621  | intron |
| 145842611 | rs6822018  | T | C | 0.3621  | intron |
| 145845180 | rs7654947  | C | T | 0.3448  | intron |
| 145845546 | rs6812389  | C | G | 0.3793  | intron |
| 145845595 |            | A | C | 0.01724 | intron |
| 145845825 |            | C | T | 0.03448 | intron |
| 145845864 | rs6817771  | C | G | 0.3448  | intron |
| 145846462 | rs6817556  | G | A | 0.3448  | intron |
| 145846483 |            | G | A | 0.03448 | intron |
| 145846847 | rs3733422  | C | T | 0.3448  | intron |
| 145846855 | rs3733423  | G | T | 0.3448  | intron |
| 145846908 | rs3733424  | A | G | 0.3448  | intron |
| 145847421 |            | G | A | 0.05172 | intron |
| 145848345 |            | T | C | 0.01724 | intron |
| 145848376 |            | T | C | 0.01724 | intron |
| 145849080 | rs2254637  | A | T | 0       | intron |
| 145849440 |            | G | T | 0.03448 | intron |
| 145851049 |            | T | C | 0.03448 | intron |
| 145851098 | rs6846476  | T | G | 0.3448  | intron |
| 145852980 | rs11100863 | A | G | 0.01724 | intron |
| 145853852 |            | A | C | 0.03448 | intron |
| 145856182 | rs6537310  | T | C | 0.3448  | intron |
| 145856222 |            | G | A | 0.03448 | intron |
| 145856525 | rs1907866  | A | T | 0.3966  | intron |
| 145856899 | rs33915726 | T | C | 0.3448  | intron |
| 145857286 |            | C | A | 0.01724 | intron |
| 145857628 | rs1389029  | C | T | 0.3793  | intron |
| 145858178 |            | T | C | 0.03448 | intron |
| 145858483 | rs6815058  | G | T | 0.3448  | intron |
| 145858723 |            | G | A | 0.01724 | intron |
| 145858768 | rs2087826  | G | A | 0.3793  | intron |
| 145859795 | rs2276934  | C | G | 0.3448  | intron |
| 145859809 |            | G | A | 0.01724 | intron |
| 145860068 |            | C | T | 0.03448 | intron |
| 145860435 | rs923783   | A | G | 0.3448  | intron |
| 145862529 | rs6854783  | G | A | 0.3448  | intron |

|           |            |   |   |         |                   |
|-----------|------------|---|---|---------|-------------------|
| 145862776 | rs6855202  | G | C | 0.3448  | intron            |
| 145862936 | rs6843518  | T | C | 0.3448  | intron            |
| 145865299 | rs9759612  | A | T | 0.4773  | intron            |
| 145866004 | rs1492818  | G | A | 0.3276  | intron            |
| 145866612 |            | G | A | 0.01724 | intron            |
| 145866697 |            | A | T | 0.01724 | intron            |
| 145867482 | rs923782   | T | C | 0.3448  | intron            |
| 145868233 | rs1552792  | C | T | 0.3621  | intron            |
| 145868491 |            | G | T | 0.03448 | intron            |
| 145868692 | rs2353915  | C | T | 0.3448  | intron            |
| 145869471 | rs1492820  | G | A | 0.3793  | intron            |
| 145870454 | rs11100864 | C | T | 0.3448  | intron            |
| 145870597 | rs11100865 | A | G | 0.3448  | intron            |
| 145871113 | rs6857302  | A | G | 0.3448  | intron            |
| 145871507 |            | T | C | 0.01724 | intron            |
| 145873096 |            | C | T | 0.01724 | intron            |
| 145873097 |            | A | C | 0.01724 | intron            |
| 145873144 | rs6827641  | T | C | 0.3793  | intron            |
| 145873947 | rs7692915  | G | T | 0.3966  | intron            |
| 145873977 |            | G | T | 0.01724 | intron            |
| 145874148 |            | A | G | 0.03448 | intron            |
| 145874261 |            | G | A | 0.01724 | intron            |
| 145874346 | rs11733546 | C | T | 0.03448 | intron            |
| 145874363 | rs11100866 | T | C | 0.3448  | intron            |
| 145874558 |            | A | G | 0.03448 | intron            |
| 145874941 | rs72718205 | T | G | 0.03448 | intron            |
| 145874982 | rs1472174  | T | G | 0.3448  | intron            |
| 145875661 | rs11100867 | T | C | 0.3448  | intron            |
| 145876352 |            | T | C | 0.01724 | intron            |
| 145876616 | rs11100868 | T | C | 0.3448  | intron            |
| 145877736 | rs6826012  | C | T | 0.3966  | intron            |
| 145877879 | rs2639576  | T | C | 0.4138  | intron            |
| 145878514 | rs11727676 | T | C | 0.08621 | coding-synonymous |
| 145878648 | rs62344037 | C | T | 0.1379  | utr-3             |
| 145881101 | rs11942655 | G | C | 0.06897 | near-gene-3       |
| 145881360 | rs2639577  | G | A | 0       | intergenic        |
| 145881365 |            | G | T | 0.03448 | intergenic        |
| 145881418 |            | G | A | 0.03448 | intergenic        |
| 145882272 | rs2639578  | C | A | 0       | intergenic        |
| 145882280 | rs2639579  | A | G | 0       | intergenic        |
| 145882292 | rs7666450  | C | T | 0.4655  | intergenic        |

|           |            |   |   |         |            |
|-----------|------------|---|---|---------|------------|
| 145882608 |            | G | A | 0.03448 | intergenic |
| 145882664 |            | C | T | 0.2931  | intergenic |
| 145882666 |            | C | T | 0.3276  | intergenic |
| 145882863 | rs2575576  | A | G | 0       | intergenic |
| 145883248 | rs72718211 | G | A | 0.4655  | intergenic |

\*SeattleSeq: <http://gvs-p.gs.washington.edu/SeattleSeqAnnotation/>

**Supplemental Table 2.** Oligonucleotides used in different assays

| Applications               | Primer name                | Primer sequence                |
|----------------------------|----------------------------|--------------------------------|
| 3C-PCR                     | Constant primer            | CTGAGACGATTCTCCGTCATTTTGTA CA  |
|                            | Target primer 2            | AACCTGGCCTCTATTTGAACAGCTAGCA   |
|                            | Target primer 4            | CTTCAGGTCTACTAATCTCTACCCCTTACA |
|                            | Target primer 9            | GGCTCCCGATTGTCAAAGAGACACTGGA   |
|                            | Target primer 10           | AATATACACAGCGGAGAGCCCTCACCA    |
|                            | Target primer 17           | CAAGTGA ACTTGCCTGTGACCTTTCTTC  |
|                            | Target primer 20           | TCCAGCTGAGTGCTGTTAGGCCATCCA    |
|                            | Target primer 21           | TTGGTAACTGGGCGTGCTATAACCCTGTA  |
|                            | Target primer 22           | AGGGTTAGATAGTGGAAGCACCCCAGA    |
|                            | Target primer 24           | GAGTCTCCAAACCATCTCAGCCTACTCAA  |
|                            | Target primer 27           | CCATAGTATGACAGTCTTCTGCATGCA    |
| ChIP-PCR                   | Control F                  | CCAATGCCAGTGTACCGTTTATGG       |
|                            | Control R                  | TCAACCCTGACACCTGTGGTTTCT       |
|                            | SNP region F               | TGCCTGTGCTTGCTCACACTTAGA       |
|                            | SNP region R               | GCCCACGTCAAACACACACCTAAA       |
| EMSA                       | rs1542725C F               | TGAATTTGGGAGGGGACACAAAC        |
|                            | rs1542725C R               | GTTTGTGTCCCCTCCCAAATTCA        |
|                            | rs1542725T F               | TGAATTTGGGAAGGGACACAAAC        |
|                            | rs1542725T R               | GTTTGTGTCCCTTCCCAAATTCA        |
|                            | 6bp mutation F             | TGAATTTGGTCATTTACACAAAC        |
|                            | 6bp mutation R             | GTTTGTGTAATGACCAAATTCA         |
|                            | Sp1 consensus seq-F        | ATTCGATCGGGGCGGGGCGAGC         |
|                            | Sp1 consensus sequence-R   | GCTCGCCCCGCCCCGATCGAAT         |
|                            | Non-identical competitor-F | AGAAATTCTCCCTGGATTTTCC         |
| Non-identical competitor-R | GGAAAATCCAGGGAGAATTTCT     |                                |

### Supplemental Table 3

Resequencing in 7k COPD GWAS SNP region on chromosome 4q31 identified 13 common SNPs. SNPs in bold are two SNPs located in 2.4k enhancer region.

| rsID (dbSNP 130) | Position (hg18)  | Reference | Alternate | MAF         |
|------------------|------------------|-----------|-----------|-------------|
| rs13435341       | 145701671        | C         | G         | 0.22        |
| rs28626624       | 145701693        | C         | T         | 0.34        |
| rs1565330        | 145701997        | C         | T         | 0.34        |
| rs12510044       | 145704088        | C         | G         | 0.57        |
| rs1980056        | 145704373        | C         | A         | 0.34        |
| N/A              | 145704968        | A         | G         | 0.02        |
| N/A              | 145705010        | C         | T         | 0.02        |
| rs1489766        | 145705011        | G         | A         | 0.02        |
| rs1980057        | 145705188        | C         | T         | 0.34        |
| rs7655625        | 145705365        | T         | C         | 0.34        |
| rs13118928       | 145705839        | A         | G         | 0.34        |
| <b>rs6537296</b> | <b>145707384</b> | <b>A</b>  | <b>G</b>  | <b>0.34</b> |
| <b>rs1542725</b> | <b>145707784</b> | <b>C</b>  | <b>T</b>  | <b>0.34</b> |

#### Supplemental Table 4

The LD structure of three SNPs rs13118928, rs6537296 and rs1542725 in the Poland Case-Control Study Population

| SNPs                  | $R^2$ | $D'$ |
|-----------------------|-------|------|
| rs13118928,rs6537296  | 0.997 | 1.0  |
| rs13118929, rs1542725 | 1.0   | 1.0  |
| rs6537296, rs1542725  | 0.997 | 1.0  |



**Supplemental Figure 1.** A. Biological replicates of 3C assay in Beas-2B cells and MRC5 cells demonstrate a similar pattern of long-range interactions of COPD GWAS SNP region with the *HHIP* promoter. The graph demonstrates the mean of normalized 3C interaction frequencies between the constant fragment containing the *HHIP* promoter and each target fragment from triplicate PCR. The y-axis refers to the number of molecules in 3C libraries from each interrogated ligation product. B, Representation of the 7kb interaction region from the UCSC Human Genome Browser. From top to bottom, tracks are shown displaying information about GWAS hits, overall multi-species sequence conservation, and pair-wise sequence conservation between human and 14 placental mammals.

**Supplemental Figure 2 A.** The minimal COPD GWAS SNP region (~500bp around two key SNPs, light purple column) cloned at forward orientation (>>>) and reverse orientation (<<<) showed enhancer activity for the *HHIP* promoter (“control”, orange) measured by dual-luciferase in MRC5 cells. Shown are ratios of firefly luciferase expression to *Renilla* luciferase expression normalized to the mean ratio from the control construct. Geometric means and standard errors are from three independent repeats with at least triplicate wells for each repeat.

**Supplemental Figure 3.** A. Multi-sequence alignments of the consensus Sp3-binding sequences flanking rs1542725 (the area in box) from the UCSC Human Genome Browser. The position of rs1542725 C/T in each alignment is indicated by a vertical arrow; dots indicate bases that are identical to the human reference sequence and dashes represent gaps within the alignments. B. Electrophoretic mobility shift analysis (EMSA) of the same amount of rs1542725C probe (radiolabeled oligonucleotides, rs15C) incubated with nuclear extract from Beas-2B cells and

either 100X competitors (unlabeled oligonucleotides) or indicated antibodies. Arrows denote specific nuclear proteins bound to the probe. WT: competitor with identical sequence (lane 2); NC: competitor with non-identical sequence; Sp1/3: competitor with Sp1/Sp3 consensus sequence (lane 3); MT: competitor with 6bp mutation surrounding rs1542725 (lane 4). Sp3 supershift band is denoted by \* in red.

Supplemental figure 1

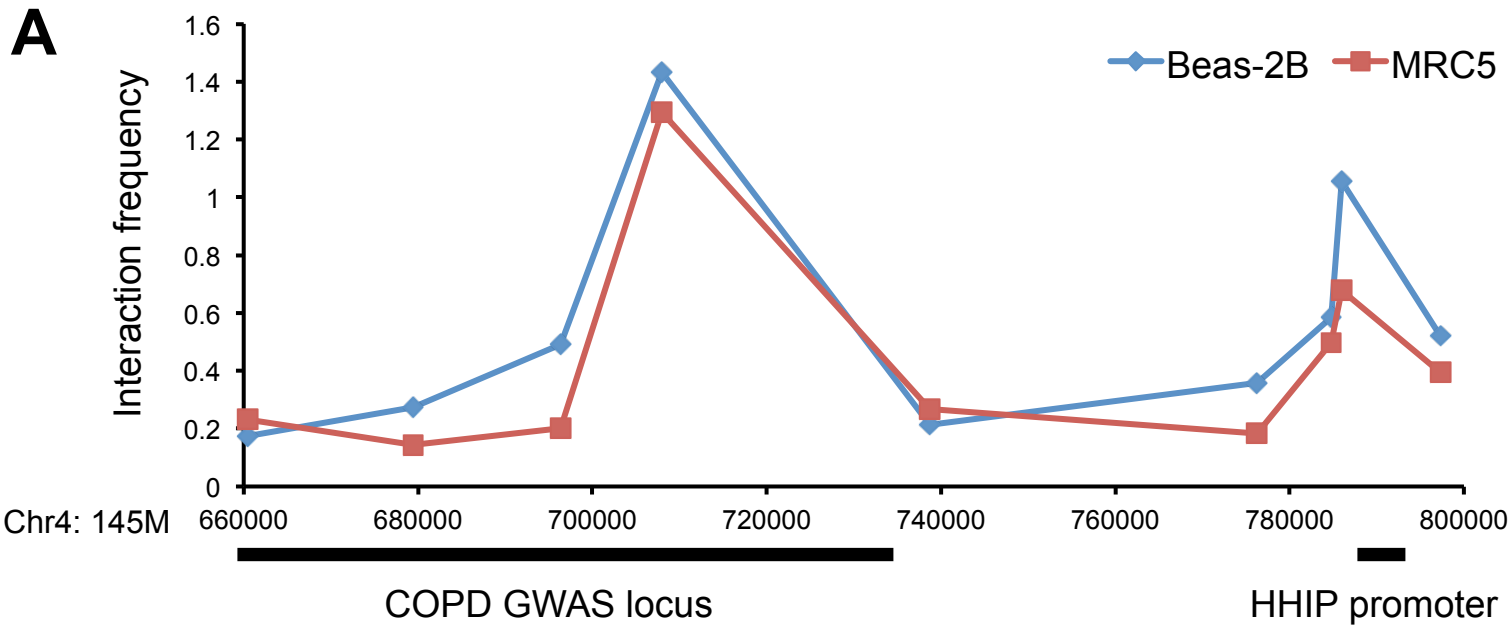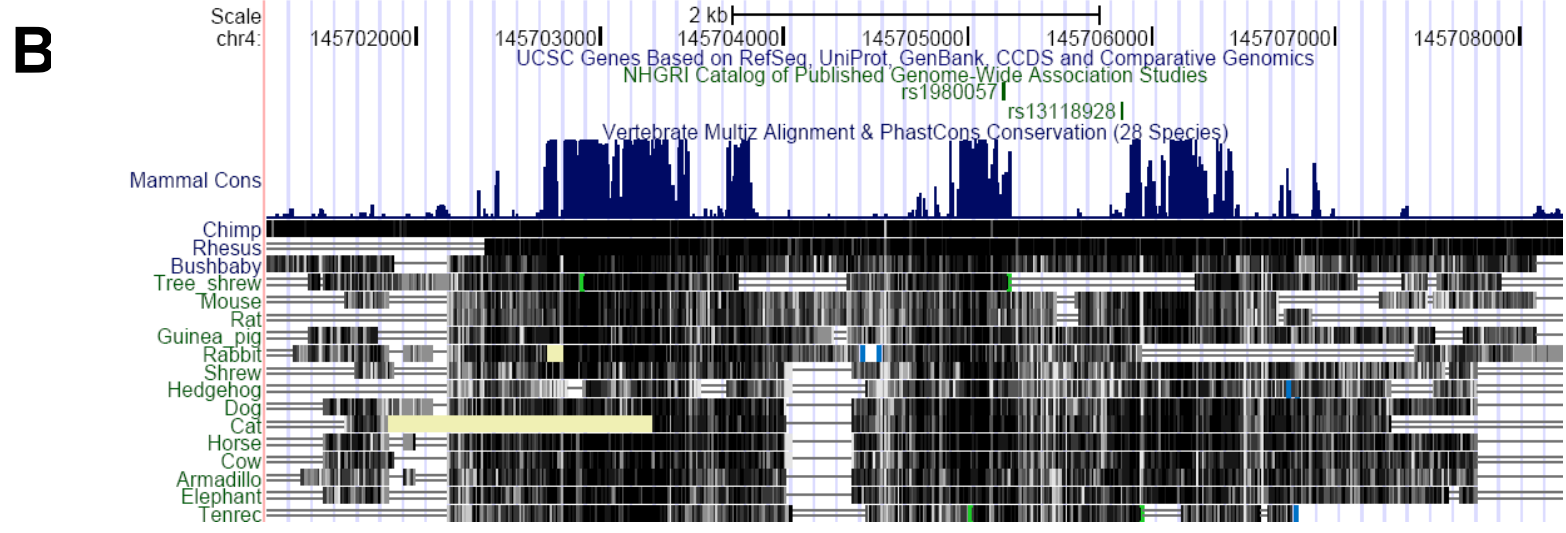

Supplemental Figure 2

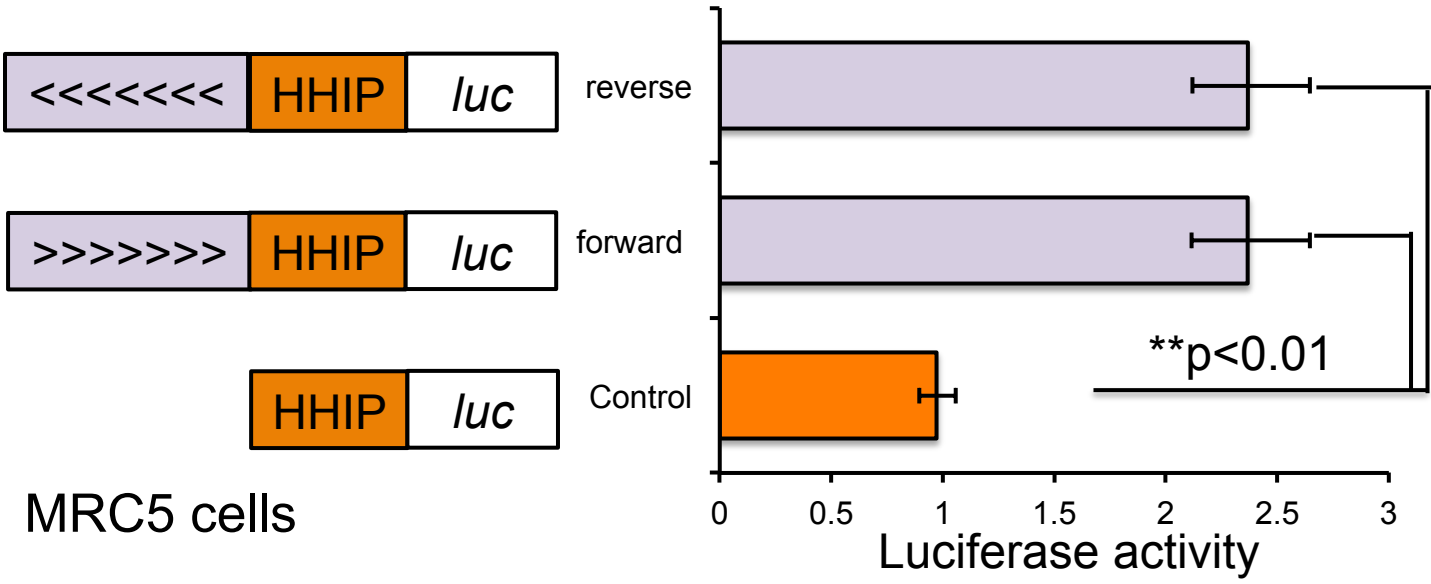

Supplemental figure 3

**A**

rs1542725

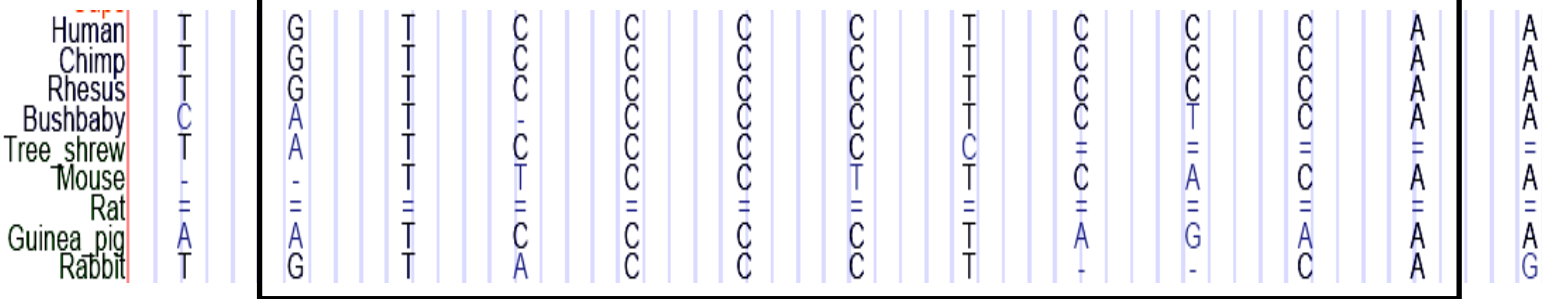

**B**

| Lane number | 1 | 2  | 3  | 4  | 5     | 6   | 7   | 8    |
|-------------|---|----|----|----|-------|-----|-----|------|
| rs15C probe | + | +  | +  | +  | +     | +   | +   | +    |
| Competitor  | - | WT | NC | MT | Sp1/3 | -   | -   | -    |
| Antibody    | - | -  | -  | -  | -     | Sp1 | Sp3 | ctrl |

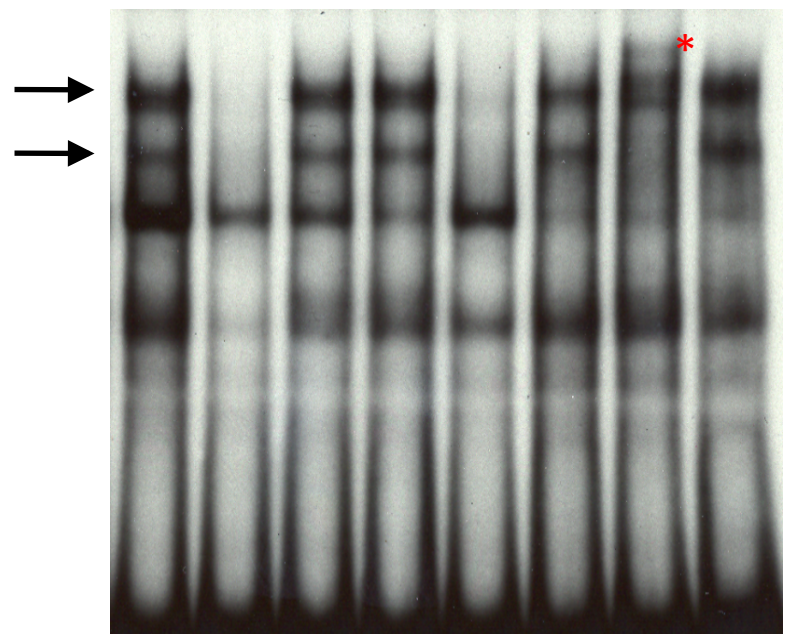

Supplement: supp_ddr569_ddr569supp.pdf [file supp_ddr569_ddr569supp.pdf]
